# Supplementary material for: Protein degradation profile reveals dynamic nature of 20S proteasome small molecule stimulation
Source: PubMed Central journal article supplement — RSC Chem Biol. 2021 Jan 5;2(2):636–44. doi: 10.1039/d0cb00191k (PMC8341874; doi:10.1039/d0cb00191k), 2021-01-05

### Supporting Information for:

#### Protein Degradation Profile Reveals Dynamic Nature of 20S Proteasome Small Molecule Stimulation

Rachel A. Coleman,<sup>a</sup> Rodrigo M. Ferreira,<sup>b</sup> Uma K. Aryal,<sup>b</sup> and Darci J. Trader<sup>a\*</sup>

<sup>a</sup>Department of Medicinal Chemistry and Molecular Pharmacology, Purdue University, 575 West Stadium Avenue, West Lafayette, Indiana 47907, United States

<sup>b</sup>Purdue Proteomics Facility, Bindley Bioscience Center and Department of Comparative Pathobiology, Purdue University, West Lafayette, Indiana 47907, United States

\*corresponding author  
dtrader@purdue.edu

#### **Supporting Information Contents:**

##### **Methods:**

*Biochemical proteasome activity assays*

*Protein degradation assay*

*Cell Culture*

*TAS3 probe analysis of 20S CP stimulators in HEK-293T cells*

*Degradation of GFP-fusion proteins in HEK-293T cells*

*Statistical Analyses of Biochemical and Cellular Assays*

*Proteomics analysis of treated HEK-293T cells*

##### **Supporting Information Figures:**

**Supporting Information Figure S1. A)** The chymotrypsin-like activity of the 20S CP was monitored using 20  $\mu$ M Suc-LLVY-AMC in the presence of DMSO (control), 25  $\mu$ M TRC-1, 25  $\mu$ M UA, 25  $\mu$ M MO, and 25  $\mu$ M AM all with and without 250  $\mu$ M SDS or 10 nM bortezomib (Btz). The change in RFU/min is plotted and shown in the table for each treatment. **B)** The effect of 250  $\mu$ M SDS on the activities of the 20S CP and 26S proteasome was also demonstrated using the Suc-LLVY-AMC reporter.

**Supporting Information Figure S2.** Results of the protein degradation assay for TRC-1 and ursolic acid (UA) are shown in **(A)** for proteins smaller than 20 kDa and **(B)** protein larger than 20 kDa. For each graph, the proteins are shown in order of increasing disorder.

**Supporting Information Figure S3.** Comparison of the fold-change in degradation between the biochemical assay and the cellular GFP-fusion assay for actin **(A)**, p53 **(B)**, and  $\alpha$ -synuclein **(C)**. \* $p < 0.05$ ; \*\* $p < 0.01$

**Supporting Information Figure S4.** Global proteomic analysis of HEK cells treated with AM, MO and Btz. **A)** Heatmap representation of Z-scored LFQ values for all quantified proteins in each AM, MO and Btz with its respective DMSO control. Color scale represents the relative Z-score. Missing values are represented by blank spaces. **B)** Volcano plot representation of treatment compared to its corresponding DMSO control. In figure legend: Grey correspond to no significance; Green correspond to proteins with  $\text{Log}_2(\text{FC}) \geq 0.5$ ; Blue correspond to proteins with  $p \leq 0.05$ , and Red correspond to proteins with both  $p \leq 0.05$  and  $\text{Log}_2(\text{FC}) \geq 0.5$ . **C)** Venn diagram of overlapping proteins in BTZ (red), AM (green) and MO (blue).

**Supporting Information Figure S5.** Treatment induced regulation of proteasome subunits. Heatmap represents all quantified proteasome subunits identified in the Btz treatment condition compared to its DMSO control. Color scale represents the relative Z-score.

**Supporting Information Tables:**

**Supporting Information Table S1.** Results of the protein degradation assay. Shown are the percent degradation values calculated from the gel band quantitation analysis. **Red** = values that are significantly ( $p < 0.05$ ) different from the “No 20S CP” samples. **Blue** = values that are significantly different from “No 20S CP” and “Basal Level” samples. **Green** = values that are significantly different from “Basal Level” samples but not “No 20S CP” samples.

**Supporting Information Table S2.** Statistical analysis of the protein degradation assay was performed using the t-test function in GraphPad Prism 8. The p-values from this analysis are shown in the table below.

**Supporting Information Table S3.** Uniprot ID and  $\log_2$ (fold-change) of proteins shown to change due to proteasome activity in the MO-treated samples. \*Separate Excel File

**Supporting Information Table S4.** Uniprot ID and  $\log_2$ (fold-change) of proteins shown to change due to proteasome activity in the AM-treated samples. \*Separate Excel File

**Appendices:**

**Appendix I: Gels from biochemical protein degradation assay**

**Appendix II: Western blots of GFP-fusion proteins**

## Methods

### Biochemical Proteasome Activity Assays

TRC-1, ursolic acid, miconazole, and AM-404 were tested in a dose-response manner using our previously reported FRET reporter to determine the ability of each molecule to stimulate the 20S CP.<sup>1</sup> Briefly, each black 384-well plate contained the following controls in triplicate: No Proteasome and Basal Level. Each well contained 20  $\mu\text{M}$  FRET reporter in Tris-HCl (50 mM, pH 7.6) and 2% DMSO in a total volume of 25  $\mu\text{L}$ . Once the FRET solution was added in triplicate for the “No Proteasome” wells, the respective proteasome isoform was added to the remainder of the FRET solution at a final concentration of 5 nM. From this solution, 24.5  $\mu\text{L}$  was added to the remaining wells. DMSO/compound was added by the addition of 0.5  $\mu\text{L}$  DMSO or 50x  $\mu\text{M}$  compound in DMSO to the wells in triplicate, such that the final concentration of compound ranged from 0.39 to 200  $\mu\text{M}$ . The plate was briefly centrifuged on a microplate centrifuge and was placed into a Tecan Infinite plate reader, which was set to heat the plate at 37°C. The excitation and emission wavelengths were set to 335 nm and 493 nm, respectively. The fluorescence was recorded every 2 min over a 60 min period, and the resulting fluorescence data was plotted against time using GraphPad Prism 8. A linear regression analysis was performed for the last 40 min of recorded fluorescence, as this is the most linear region. The slope of this line is described as the rate of hydrolysis of the FRET peptide reporter by the 20S CP. This procedure was repeated to test the effect of each molecule at 25  $\mu\text{M}$  on the activity of the 26S proteasome. However, for the assay using the 26S proteasome, 1 mM ATP and 10 mM  $\text{MgCl}_2$  were included in the Tris-HCl (50 mM, pH 7.6)

A similar assay was performed to examine the effect of each stimulator on the chymotrypsin-like activity of the 20S CP in the absence and presence of 250  $\mu\text{M}$  sodium dodecyl sulfate (SDS) or 10 nM bortezomib (Btz). This assay was performed as described above with the following modifications: 20  $\mu\text{M}$  Suc-LLVY-AMC was used instead of the FRET reporter. SDS or Btz were added to the solution of 20S CP prior to the addition of the small molecule stimulators. With the exception of these modifications, the assay was performed as described above. The  $\Delta\text{RFU}/\text{min}$  were plotted in GraphPad Prism 8 and compared between samples, **Supporting Information Figure S1A**. For a comparison of how SDS impacts the activity of the 26S proteasome, a similar assay was performed using the 26S proteasome in Tris-HCl (50 mM, pH 7.6, 1 mM ATP, 10 mM  $\text{MgCl}_2$ ), **Supporting Information Figure S1B**.

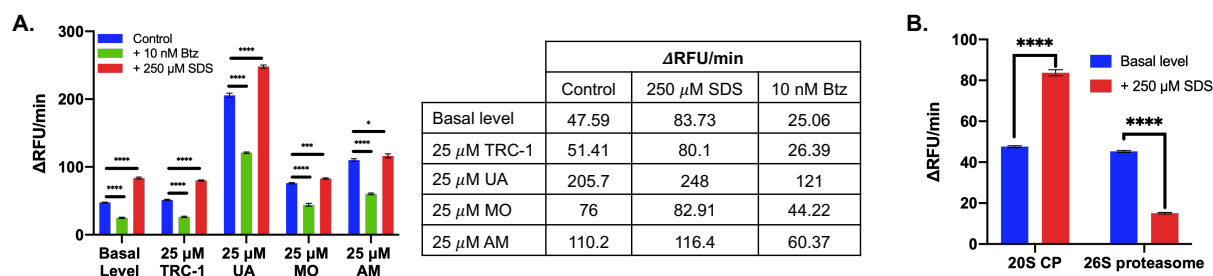

**Supporting Information Figure S1.** **A)** The chymotrypsin-like activity of the 20S CP was monitored using 20  $\mu\text{M}$  Suc-LLVY-AMC in the presence of DMSO (control), 25  $\mu\text{M}$  TRC-1, 25  $\mu\text{M}$  UA, 25  $\mu\text{M}$  MO, and 25  $\mu\text{M}$  AM all with and without 250  $\mu\text{M}$  SDS or 10 nM bortezomib (Btz). The change in RFU/min is plotted and shown in the table for each treatment. **B)** The effect of 250  $\mu\text{M}$  SDS on the activities of the 20S CP and 26S proteasome was also demonstrated using the Suc-LLVY-AMC reporter.

## Protein Degradation Assay

Each protein was diluted in Tris-HCl (50 mM, pH 7.6) to a final concentration of 50 ng/ $\mu$ L. The small molecule 20S CP stimulators were dissolved in DMSO and diluted to a final concentration of 75  $\mu$ M in Tris-HCl, containing 6% DMSO. A solution of 15 nM 20S CP was made by diluting the 2  $\mu$ M purchased stock solution of human 20S CP (Boston Biochem Cat. #E-360) in Tris-HCl. The following samples were prepared for each compound and each protein in triplicate: No 20S CP, Basal Level, and 25  $\mu$ M stimulator. The No 20S CP samples were prepared by mixing 4  $\mu$ L of the 50 ng/ $\mu$ L protein solution and 8  $\mu$ L of 3% DMSO in Tris-HCl. The Basal Level samples were prepared by mixing 4  $\mu$ L of the 50 ng/ $\mu$ L protein solution, 4  $\mu$ L of 6% DMSO in Tris-HCl, and 4  $\mu$ L of 15 nM 20S CP. The 25  $\mu$ M stimulator samples were prepared by mixing 4  $\mu$ L of the 50 ng/ $\mu$ L protein solution, 4  $\mu$ L of the 75  $\mu$ M stimulator solution, and 4  $\mu$ L of 15 nM 20S CP.

Each of the samples contained a total volume of 12  $\mu$ L, a final DMSO concentration of 2%, and 200 ng of protein. The samples containing the 20S CP had a final concentration of 5 nM 20S CP, and the samples containing the small molecule had a final concentration of 25  $\mu$ M stimulator.

Following preparation, the samples were incubated for 2 hr at 37°C. After this period, 4  $\mu$ L of 4x SDS gel loading buffer was added to each sample, which were then heated for 5 min at 95°C. The samples were then loaded onto a 15-well gradient gel for SDS-PAGE. The gels were stained with Coomassie, imaged with a LICOR Odyssey, and quantitated using ImageJ. For each protein, the calculated band intensities were normalized. This allowed for the No 20S CP samples and the Basal Level samples to be compared for each protein across all samples for that protein (4 gels = 12 replicates for No 20S CP and Basal Level samples). The triplicate of stimulator treated samples were then compared to the total No 20S CP and Basal Level replicates from all gels. The results of this analysis are shown in **Supporting Information Table S1, Supporting Information Table S2, Figures 2C and 2D, Supporting Information Figures S2A and S2B, and Appendix I.**

**Supporting Information Table S1.** Results of the protein degradation assay. Shown are the percent degradation values calculated from the gel band quantitation analysis. **Red** = values that are significantly ( $p < 0.05$ ) different from the “No 20S CP” samples. **Blue** = values that are significantly different from “No 20S CP” and “Basal Level” samples. **Green** = values that are significantly different from “Basal Level” samples but not “No 20S CP” samples.

| Protein               | Degradation (%) |                  |                         |                       |                   |
|-----------------------|-----------------|------------------|-------------------------|-----------------------|-------------------|
|                       | Basal Level     | 25 $\mu$ M TRC-1 | 25 $\mu$ M Ursolic Acid | 25 $\mu$ M Miconazole | 25 $\mu$ M AM-404 |
| Lysozyme              | (2)             | (4)              | 3                       | 14                    | 3                 |
| GAPDH                 | (1)             | 3                | (1)                     | (4)                   | 2                 |
| Actin                 | 8               | 12               | 18                      | 22                    | 24                |
| Gankyrin              | 10              | 20               | 6                       | 29                    | 31                |
| BSA                   | 0               | (1)              | 2                       | 18                    | 7                 |
| Carbonic Anhydrase 2  | (5)             | (2)              | 1                       | 9                     | (2)               |
| Cytochrome C          | 5               | 18               | 7                       | 51                    | 15                |
| Interferon Gamma      | 10              | 2                | 8                       | 31                    | 28                |
| p16                   | 6               | 10               | 33                      | 45                    | 9                 |
| TDP-43                | 25              | 18               | 5                       | 24                    | 57                |
| p53                   | 23              | 15               | 23                      | 34                    | 49                |
| Calmodulin            | 17              | 23               | 20                      | 43                    | 99                |
| p21                   | 13              | 6                | 24                      | 43                    | 23                |
| $\alpha$ -Synuclein   | 30              | 66               | 63                      | 94                    | 90                |
| Tau (1-383) Isoform D | 53              | 81               | 85                      | 96                    | 97                |

The following proteins were tested: lysozyme (MP Biomedicals Cat. #02100834), GAPDH (Fisher Scientific Cat. #PILFP0008), actin (Novus Biologicals Cat. #NBP2-22670), gankyrin (AddGene Cat.

#31332), bovine serum albumin (BSA; Millipore Sigma Cat. #A8531), carbonic anhydrase 2 (Millipore Sigma Cat. #C7025), cytochrome C (Millipore Sigma Cat. #C7150), interferon gamma (BioLegend Cat. #713906), p16 (Novus Biologicals Cat. #NBP2-35199), TDP-43 (Novus Biologicals Cat. #AP-190-100), p53 (Novus Biologicals Cat. #SP-454-020), calmodulin (gift from Prof. Val Watts of Purdue University), p21 (Novus Biologicals Cat. #NBP2-22976),  $\alpha$ -synuclein (Novus Biologicals Cat. #NBP2-54787), and tau isoform D (Novus Biologicals Cat. #NBP1-50881).

**Supporting Information Table S2.** Statistical analysis of the protein degradation assay was performed using the t-test function in GraphPad Prism 8. The p-values from this analysis are shown in the table below.

| Protein               | P-values                |                                                      |                                                      |                                                      |                                                      |
|-----------------------|-------------------------|------------------------------------------------------|------------------------------------------------------|------------------------------------------------------|------------------------------------------------------|
|                       | Basal Level             | 25 $\mu$ M TRC-1                                     | 25 $\mu$ M Ursolic Acid                              | 25 $\mu$ M Miconazole                                | 25 $\mu$ M AM-404                                    |
| Lysozyme              | No 20S CP: 0.397231     | No 20S CP: 0.240080<br>Basal Level: 0.303763         | No 20S CP: 0.400768<br>Basal Level: 0.084619         | No 20S CP: 0.001311**<br>Basal Level: 0.000021***    | No 20S CP: 0.408289<br>Basal Level: 0.090490         |
| GAPDH                 | No 20S CP: 0.211028     | No 20S CP: 0.103094<br>Basal Level: 0.028158*        | No 20S CP: 0.559181<br>Basal Level: 0.884347         | No 20S CP: 0.060264<br>Basal Level: 0.254649         | No 20S CP: 0.216438<br>Basal Level: 0.062564         |
| Actin                 | No 20S CP: 0.000475***  | No 20S CP: 0.000232***<br>Basal Level: 0.301277      | No 20S CP: 0.000001***<br>Basal Level: 0.016051*     | No 20S CP: <0.000001***<br>Basal Level: 0.002002**   | No 20S CP: <0.000001***<br>Basal Level: 0.000807***  |
| Gankyrin              | No 20S CP: 0.000217***  | No 20S CP: <0.000001***<br>Basal Level: 0.071137     | No 20S CP: 0.031827*<br>Basal Level: 0.374493        | No 20S CP: <0.000001***<br>Basal Level: 0.002744**   | No 20S CP: <0.000001***<br>Basal Level: 0.001058**   |
| BSA                   | No 20S CP: 0.915222     | No 20S CP: 0.817950<br>Basal Level: 0.806082         | No 20S CP: 0.644264<br>Basal Level: 0.465765         | No 20S CP: 0.001982**<br>Basal Level: 0.000113***    | No 20S CP: 0.126688<br>Basal Level: 0.031796*        |
| Carbonic Anhydrase 2  | No 20S CP: 0.002434**   | No 20S CP: 0.517224<br>Basal Level: 0.171621         | No 20S CP: 0.776868<br>Basal Level: 0.022479*        | No 20S CP: 0.006342**<br>Basal Level: 0.000019***    | No 20S CP: 0.532365<br>Basal Level: 0.141248         |
| Cytochrome C          | No 20S CP: 0.001222**   | No 20S CP: <0.000001***<br>Basal Level: 0.000227***  | No 20S CP: 0.000840***<br>Basal Level: 0.437880      | No 20S CP: <0.000001***<br>Basal Level: <0.000001*** | No 20S CP: <0.000001***<br>Basal Level: 0.002205**   |
| Interferon Gamma      | No 20S CP: 0.000284***  | No 20S CP: 0.520070<br>Basal Level: 0.110961         | No 20S CP: 0.026286*<br>Basal Level: 0.654476        | No 20S CP: <0.000001***<br>Basal Level: 0.000392***  | No 20S CP: <0.000001***<br>Basal Level: 0.001628**   |
| p16                   | No 20S CP: 0.000548***  | No 20S CP: 0.000359***<br>Basal Level: 0.203280      | No 20S CP: <0.000001***<br>Basal Level: <0.000001*** | No 20S CP: <0.000001***<br>Basal Level: <0.000001*** | No 20S CP: 0.000630***<br>Basal Level: 0.318808      |
| TDP-43                | No 20S CP: 0.000058***  | No 20S CP: <0.000001***<br>Basal Level: 0.205046     | No 20S CP: 0.005458**<br>Basal Level: 0.406684       | No 20S CP: 0.000006***<br>Basal Level: 0.259367      | No 20S CP: <0.000001***<br>Basal Level: <0.000001*** |
| p53                   | No 20S CP: <0.000001*** | No 20S CP: 0.000017***<br>Basal Level: 0.124828      | No 20S CP: <0.000001***<br>Basal Level: 0.418167     | No 20S CP: <0.000001***<br>Basal Level: 0.133102     | No 20S CP: <0.000001***<br>Basal Level: 0.000016***  |
| Calmodulin            | No 20S CP: 0.000128***  | No 20S CP: <0.000001***<br>Basal Level: 0.003457**   | No 20S CP: <0.000001***<br>Basal Level: 0.004839**   | No 20S CP: <0.000001***<br>Basal Level: <0.000001*** | No 20S CP: <0.000001***<br>Basal Level: <0.000001*** |
| p21                   | No 20S CP: 0.000347***  | No 20S CP: 0.015451*<br>Basal Level: 0.367027        | No 20S CP: <0.000001***<br>Basal Level: 0.111140     | No 20S CP: <0.000001***<br>Basal Level: 0.000421***  | No 20S CP: <0.000001***<br>Basal Level: 0.132610     |
| $\alpha$ -Synuclein   | No 20S CP: <0.000001*** | No 20S CP: <0.000001***<br>Basal Level: 0.000007***  | No 20S CP: <0.000001***<br>Basal Level: 0.000022***  | No 20S CP: <0.000001***<br>Basal Level: <0.000001*** | No 20S CP: <0.000001***<br>Basal Level: <0.000001*** |
| Tau (1-383) Isoform D | No 20S CP: <0.000001*** | No 20S CP: <0.000001***<br>Basal Level: <0.000001*** |

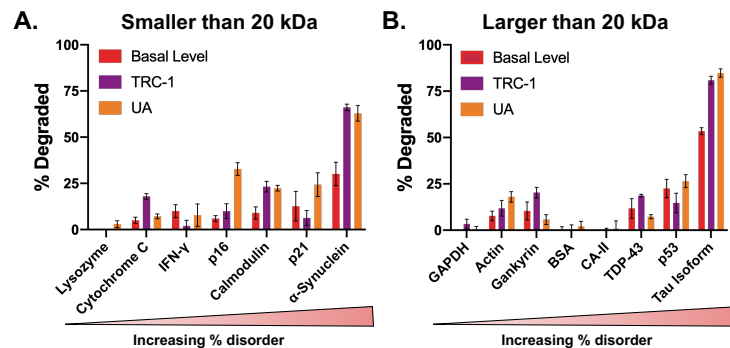

**Supporting Information Figure S2.** Results of the protein degradation assay for TRC-1 and ursolic acid (UA) are shown in (A) for proteins smaller than 20 kDa and (B) protein larger than 20 kDa. For each graph, the proteins are shown in order of increasing disorder.

## Cell culture

HEK-293T cells purchased from ATCC were cultured in Dulbecco's Modified Eagle's Medium (DMEM), supplemented with 10% Fetal Bovine Serum (FBS) and 1% penicillin/streptomycin. Cultures were maintained at 37°C with 5% CO<sub>2</sub>.

## TAS3 probe analysis of 20S CP stimulators in HEK-293T cells

HEK-293T cells were plated on a black 96-well plate at 5000 cells/well. After 24 hr, the cells were treated with the following in three replicates: DMSO (0.001%, control) or 10 μM bortezomib. The plate was placed in the CO<sub>2</sub> incubator for 30 min. After this time period, the plate was removed, and the cells were treated with 25 μM TRC-1, 25 μM ursolic acid, 25 μM miconazole, or 25 μM AM-404 in triplicate. Treatment was performed by adding 10 μL of an 11x solution of compound diluted in medium, ensuring a final DMSO concentration of 0.001%. The plate was incubated in the CO<sub>2</sub> incubator for an additional 30 min. After this time period, the medium was removed. To each well was added 50 μL of 10 μM TAS3 in Krebs-Ringer Bicarbonate (KRBH) buffer, containing the respective control or compound at the aforementioned concentrations. The plate was immediately placed on the Tecan Infinite plate reader, heated at 37°C. Fluorescence intensity was recorded every 2 min over a 90 min period. A linear regression analysis was performed for the last 60 min of this period, as this is the most linear region. The resulting slope of this analysis is compared between samples to determine the increase or decrease in activity compared to the DMSO control.

## Degradation of GFP-fusion proteins in HEK-293T cells

HEK-293T cells on a T-75 flask were transiently transfected to express a GFP-fusion protein (GFP- $\alpha$ -synuclein, GFP-p53, or Actin-GFP) using Lipofectamine 2000, 20 μg DNA, and Opti-MEM. After 24 hr, the transfected cells were plated on 6-well plates at 300,000 cells/well. The cells were treated 24 hr after plating with the following in triplicate: DMSO (0.001%, control), 25 μM AM-404, or 25 μM miconazole. Following 24 hr of treatment, the cells were lysed with a solution of M-PER containing Halt protease inhibitor cocktail. The cell lysates were normalized to total protein concentration and analyzed by immunoblot for GFP (**Appendix II**). Quantitative analysis was performed using ImageJ. For each sample, the ratio of free GFP to the GFP-fusion protein was calculated. This calculated ratio of all treated cell lysates was compared to the control (DMSO) to determine a change in 20S CP-mediated degradation. These changes were then compared to the changes observed in the biochemical degradation assay (**Supporting Information Figure S3**).

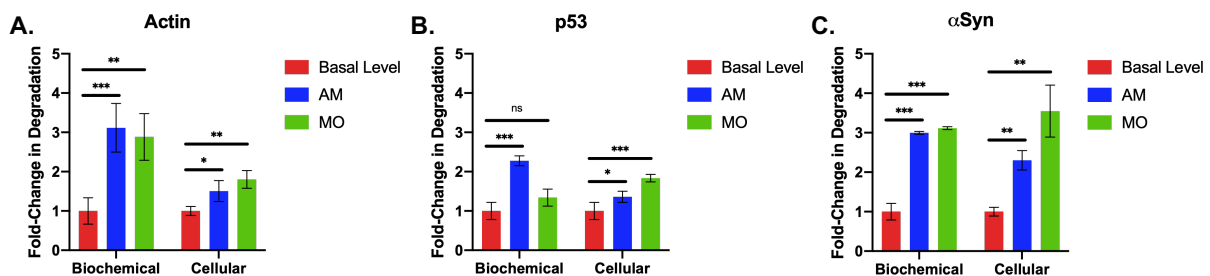

**Supporting Information Figure S3.** Comparison of the fold-change in degradation between the biochemical assay and the cellular GFP-fusion assay for actin (A), p53 (B), and  $\alpha$ -synuclein (C). \*p < 0.05; \*\*p < 0.01; \*\*\*p < 0.001

## Statistical Analyses of Biochemical and Cellular Assays

For the fluorescent activity assays, a linear regression analysis was performed, and the slopes of the resulting lines were compared between the treated and basal level (DMSO control) samples. To determine if the changes were significant, a student's t-test analysis was performed using GraphPad Prism 8 to obtain p-values. A p-value less than 0.05 is considered significant.

Similarly, for the densitometry analyses of Coomassie-stained gels and Western blots, the calculated values were put into GraphPad Prism 8 to determine the statistical significance by performing the student's t-test function to obtain p-values.

## Proteomics analysis of treated HEK-293T cells

### *HEK-293T cell treatment*

HEK-293T cells were plated on T-25 flasks. The following day, the cells were treated with the following in four replicates: DMSO1 (0.001%, control 1), 25  $\mu$ M miconazole (MO), DMSO2 (0.001%, control 2), 25  $\mu$ M AM-404 (AM), 10 nM bortezomib (Btz), 25  $\mu$ M MO + 10 nM Btz, or 25  $\mu$ M AM + 10 nM Btz. DMSO1 and 25  $\mu$ M MO treatment were performed at the same time, such that DMSO1 is the reference control for the MO treatment. Similarly, DMSO2 and the other cell treatments were performed at the same time, such that DMSO2 is the reference control for these treatments. Following 24 hr of treatment, the cells were collected and pelleted by centrifugation at 1000  $\times$ g for 5 min. The cell pellets were washed four times with PBS buffer and transported to the Purdue Proteomics Core Facility in PBS on ice.

### *Protein extraction*

Cells were centrifuged at 6000 rpm for 5 min at 4°C. Pellets were resuspended in 200  $\mu$ L of 4M urea buffer and homogenized using Precellys® 24 Bead Mill Homogenizer (Berti) at 6500 rpm for 2 min at 30 sec/cycle. Freshly prepared serine protease inhibitor phenylmethylsulfonyl fluoride (PMSF) was added to each tube at final concentration of 1 mM prior to homogenization. After homogenization, the lysates were sonicated on ice for 15 min and precipitated overnight at -20°C using 4 volume of cold (-20°C) 100% acetone. Samples were centrifuged at 14,000 rpm for 15 min at 4°C; the resulting pellets were washed twice using cold (-20°C) 80% acetone and dried in Vacuum Centrifuge for 5 min at 50°C before solubilizing in 50  $\mu$ L of 8M urea. Samples were incubated at room temperature for 1 hour with continuous vortexing. The solution was centrifuged at 14,000 rpm for 15 min at 4°C to remove any undissolved pellets and cell debris. Protein concentration was measured by bicinchoninic acid (BCA) assay with BSA as a standard.

Fifty (50)  $\mu$ g protein from each sample was reduced, alkylated and digested using the previously published protocol.<sup>2,3</sup> Briefly, samples were reduced by incubating in 10 mM dithiothreitol (DTT) at 37°C for 45 min, and cysteine alkylated by incubating in 20 mM iodoacetamide (IAA) in the dark for 45 min at room temperature. Proteins were digested overnight at 37°C using mass spec grade trypsin and Lys-C mix (Promega Corporation, Madison, WI, USA) at 1:25 (w/w) enzyme-to-protein. The digested peptides were cleaned using C18 silica micro spin columns (The Nest Group Inc.) using the manufacturer's protocol. Peptides were eluted using 80% acetonitrile containing 0.1% formic acid (FA). The samples were vacuum dried and re-suspended in 3% acetonitrile and 0.1% formic acid. Peptide concentration was determined by BCA assay using BSA as standard. The concentration of peptides was adjusted to 0.2  $\mu$ g/ $\mu$ L and 5  $\mu$ L (1  $\mu$ g total peptide) was used for LC-MS/MS analysis in Orbitrap Fusion Lumos Mass Spectrometer.

### *LC/MS-MS data acquisition*

Samples were analyzed by reverse-phase LC-ESI-MS/MS system using the Dionex UltiMate 3000 RSLC nano System coupled to the Orbitrap Fusion Lumos Mass Spectrometer (Thermo Fisher Scientific, Waltham, MA). Peptides were loaded onto a trap column (300  $\mu\text{m}$  ID  $\times$  5 mm) packed with 5  $\mu\text{m}$  100 Å Acclaim PepMap C18 medium, and then separated on a reverse phase column (50-cm long  $\times$  75  $\mu\text{m}$  ID) packed with 2  $\mu\text{m}$  100 Å Acclaim PepMap C18 silica (Thermo Fisher Scientific, Waltham, MA). The column temperature was maintained at 50°C. All the MS measurements were performed in the positive ion mode, using 160 min LC gradient and standard data-dependent mode.

Mobile phase solvent A was 0.1% formic acid (FA) in water and solvent B was 0.1% FA in 80% acetonitrile (I). Loading buffer was 98% water/2% I/0.1% FA. Peptides were loaded to the trap column using a loading buffer for 5-min at 5  $\mu\text{L}/\text{min}$  flow rate and eluted from the analytical column with a linear 110-min gradient of 3-27% of buffer B, then changing to 40% of B at 125 min, 100% of B at 135-min at which point the gradient was held for 10 min before reverting to 2% of B at 145-min. Peptides were separated from the analytical column at a flow rate of 300 nL/min. The column temperature was maintained at 50°C. The mass spectrometer was operated in positive ion and standard data-dependent acquisition mode with Advanced Peak Detection function activated. The fragmentation of precursor ion was accomplished by higher energy collision dissociation at a normalized collision energy setting of 30%. The resolution of Orbitrap mass analyzer was set to 120,000 and 15,000 for MS1 and MS2, with maximum injection time of 50 ms for both MS1 and MS2. The dynamic exclusion was set at 60 s to avoid repeated scanning of identical peptides; charge state was set at 2-7 with 2 as a default charge and mass tolerance of 10 ppm for both high and low. The full scan MS1 spectra were collected in the mass range of 375-1,500 m/z and MS2 in 300-1250 m/z. The spray voltage was set at 2 and AGC target of  $4e^5$  for MS1 and  $5e^4$  for MS2, respectively. MS1 data types were in profile mode and MS2 data types were in centroid mode. Three biological samples were analyzed for each organ. The instrument was calibrated at the start of each batch run and then every 72 hours using a calibration mix solution (Thermo Fisher Scientific). The performance of the instrument was monitored routinely using Hela cell digest from Thermo Scientific.

### *LC-MS/MS data analysis*

LC-MS/MS data were analyzed using MaxQuant software (version 1.6.3.3) against the *Homo sapiens* protein database (26,446 sequences as of 08/03/2019, [www.unitprot.org](http://www.unitprot.org)) concatenated with a common contaminants and a reverse-decoy database.<sup>45</sup> Enzymes were setup as Trypsin and LysC, allowing up to 2 missed cleavages. Mass error was set to 10 ppm and 20 ppm for MS1 and MS2, respectively. Alkylation of cysteine and oxidation of methionine was set to fixed and variable modifications, respectively. The false discovery rate (FDR) threshold was set to 0.01 for both the peptides and the proteins. The peptide quantitation was conducted using ‘unique plus razor peptides.’ The razor peptides are the non-unique peptides assigned to protein/protein group with most other peptides.

The raw MaxQuant output file was then processed with Perseus (version 1.6.10.50). Proteins identified as “contaminants”, “reverse” and “only identified by site” were removed, and LFQ values were  $\text{Log}_2$  transformed. Proteins with  $\text{Log}_2(\text{LFQ})$  values in at least 2 biological replicates were retained, and missing values were then imputed based on the column’s normal distribution. T-test were performed with each treatment group against its corresponding DMSO control. Significantly regulated proteins were defined as proteins with a  $p \leq 0.05$  and  $\text{Log}_2(\text{fold change}) \geq 0.5$ . Gene ontology was performed using the Metascape software.



Those proteins that significantly changed in the MO-treated samples were examined in the Btz-MO-treated samples to determine which proteins were changing due to proteasome activity, **Supporting Information Table S3**. For this analysis, a difference in  $\text{Log}_2(\text{fold-change})$  of 0.5 or a 50% decrease in the  $\text{Log}_2(\text{fold-change})$  observed in the MO-treated samples were considered significant. A similar analysis was performed for the proteins that significantly changed in the AM-treated samples, **Supporting Information Table S4**.

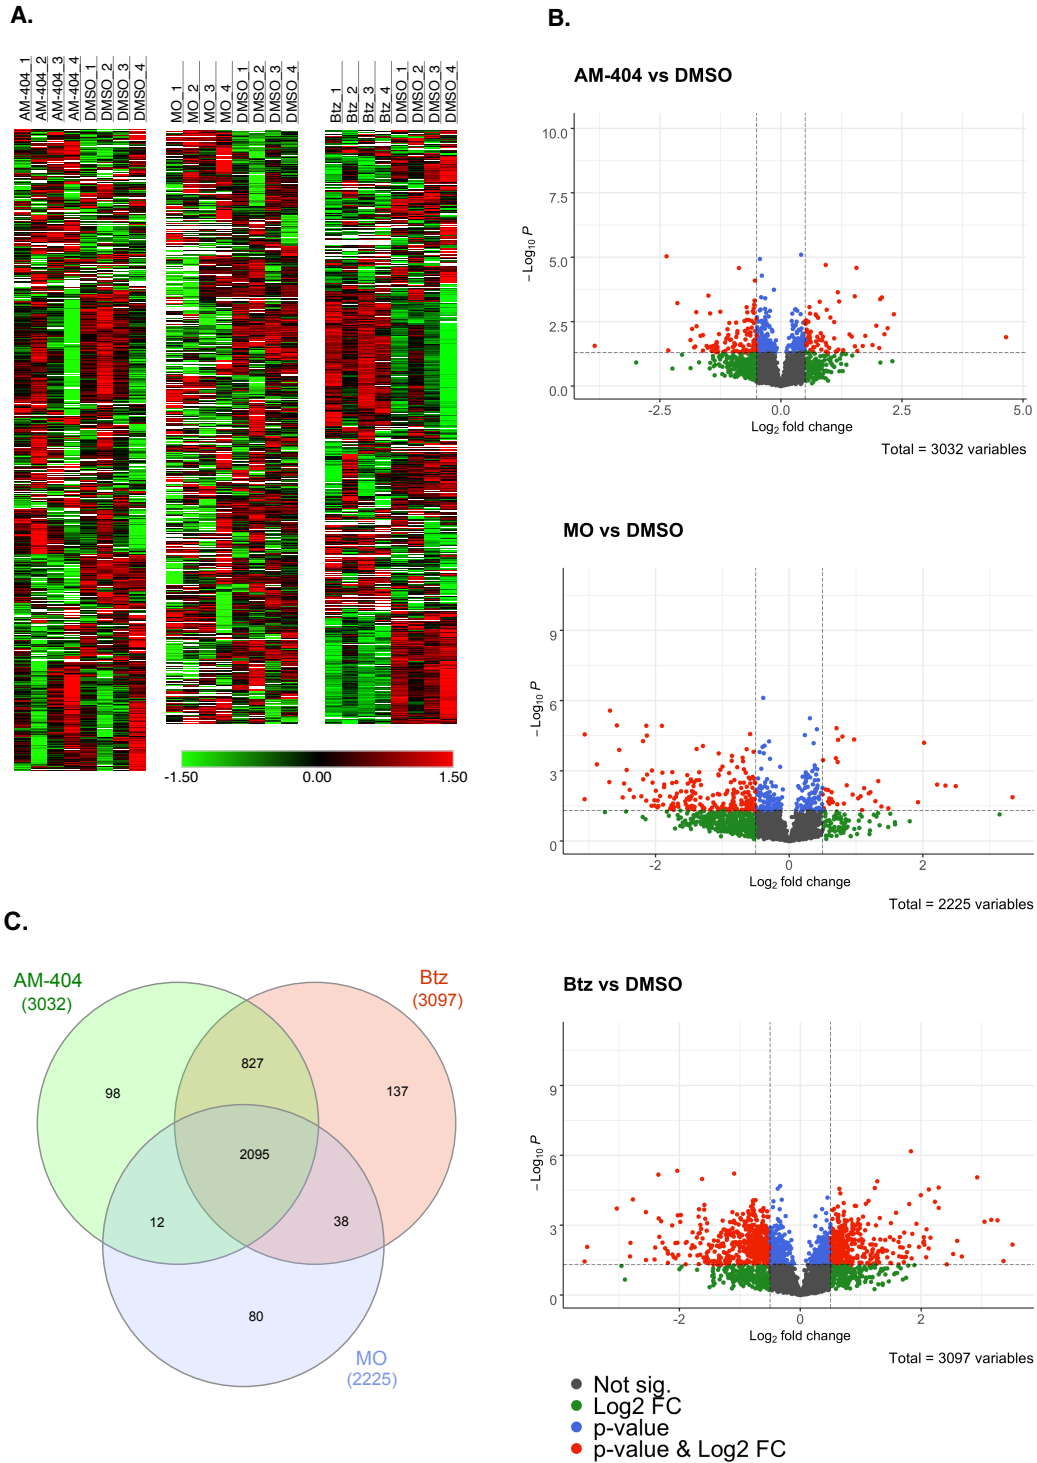

**Supporting Information Figure S4.** Global proteomic analysis of HEK cells treated with AM, MO and Btz. **A)** Heatmap representation of Z-scored LFQ values for all quantified proteins in each AM, MO and Btz with its respective DMSO control. Color scale represents the relative Z-score. Missing values are represented by blank spaces. **B)** Volcano plot representation of treatment compared to its corresponding DMSO control. In figure legend: Grey correspond to no significance; Green correspond to proteins with  $\text{Log}_2(\text{FC}) \geq 0.5$ ; Blue correspond to proteins with  $p \leq 0.05$ , and Red correspond to proteins with both  $p \leq 0.05$  and  $\text{Log}_2(\text{FC}) \geq 0.5$ . **C)** Venn diagram of overlapping proteins in BTZ (red), AM-404 (green) and MO (blue).

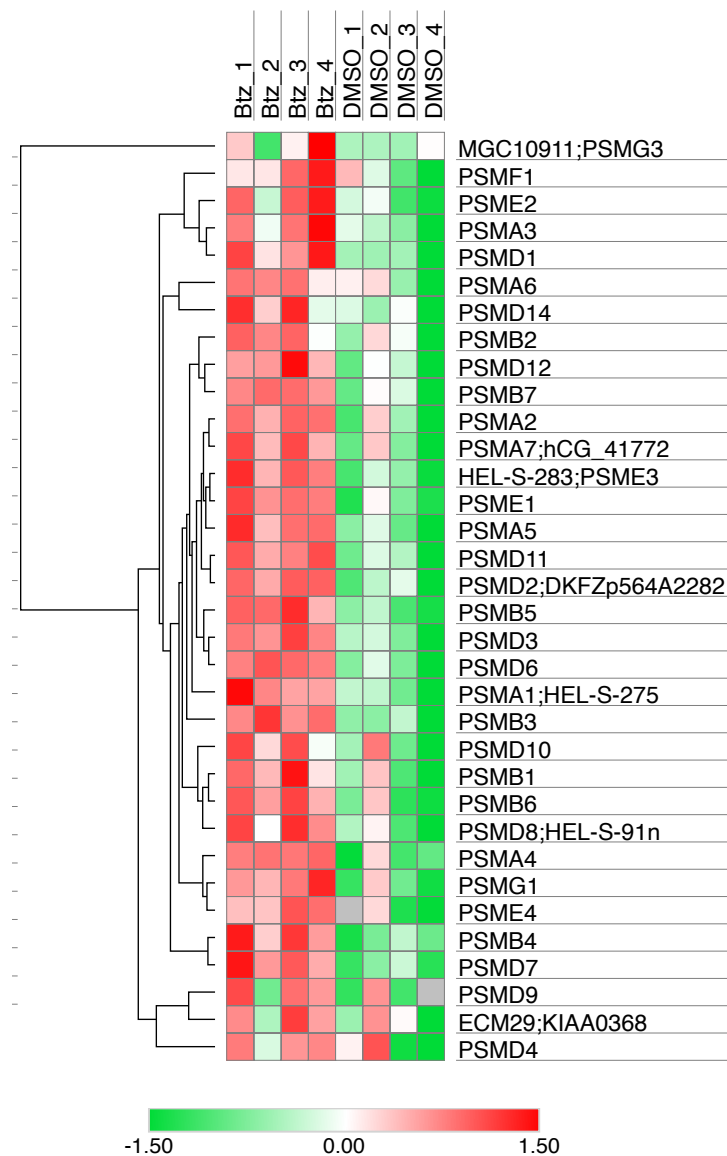

**Supporting Information Figure S5.** Treatment induced regulation of proteasome subunits. Heatmap represents all quantified proteasome subunits identified in the Btz treatment condition compared to its DMSO control. Color scale represents the relative Z-score.

#### References:

- (1) Coleman, R. A.; Trader, D. J. A Sensitive High-Throughput Screening Method for Identifying Small Molecule Stimulators of the Core Particle of the Proteasome. *Curr. Protoc. Chem. Biol.* **2018**, *10* (4), e52. <https://doi.org/10.1002/cpch.52>.
- (2) Harlow, K.; Suarez-Trujillo, A.; Hedrick, V.; Sobreira, T.; Aryal, U. K.; Stewart, K.; Casey, T. Temporal Analysis of Vaginal Proteome Reveals Developmental Changes in Lower Reproductive Tract of Gilts across the First Two Weeks Postnatal. *Sci. Rep.* **2019**, *9* (1), 1–8. <https://doi.org/10.1038/s41598-019-49597-w>.
- (3) Barabas, A. J.; Aryal, U. K.; Gaskill, B. N. Proteome Characterization of Used Nesting Material and Potential Protein Sources from Group Housed Male Mice, *Mus Musculus*. *Sci. Rep.* **2019**, *9* (1), 1–10. <https://doi.org/10.1038/s41598-019-53903-x>.

- (4) Cox, J.; Mann, M. MaxQuant Enables High Peptide Identification Rates, Individualized p.p.b.-Range Mass Accuracies and Proteome-Wide Protein Quantification. *Nat. Biotechnol.* **2008**, *26* (12), 1367–1372. <https://doi.org/10.1038/nbt.1511>.
- (5) Cox, J.; Neuhauser, N.; Michalski, A.; Scheltema, R. A.; Olsen, J. V.; Mann, M. Andromeda: A Peptide Search Engine Integrated into the MaxQuant Environment. *J. Proteome Res.* **2011**, *10* (4), 1794–1805. <https://doi.org/10.1021/pr101065j>.

**Appendix I: Gels from biochemical protein degradation assay**

Red: Significantly different from No 20S CP

Green: Significantly different from DMSO

Blue: Significantly different from No 20S CP and DMSO

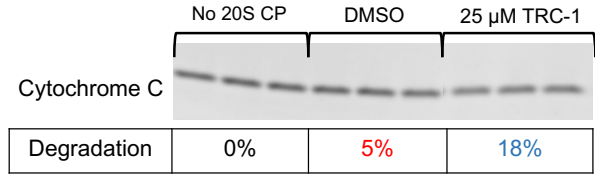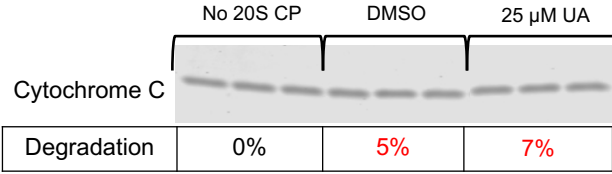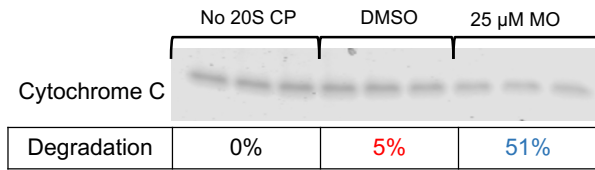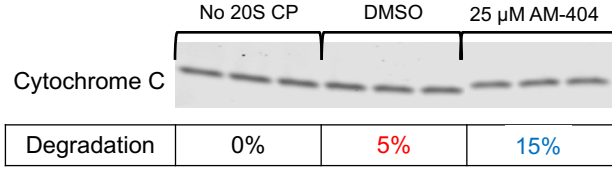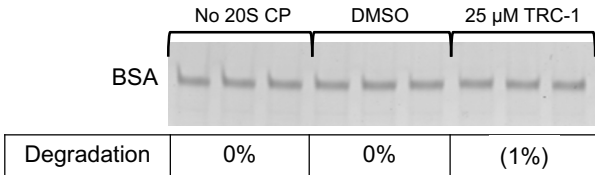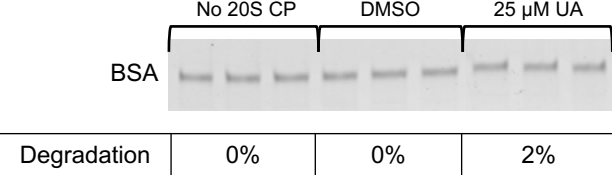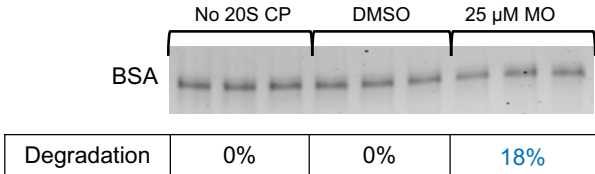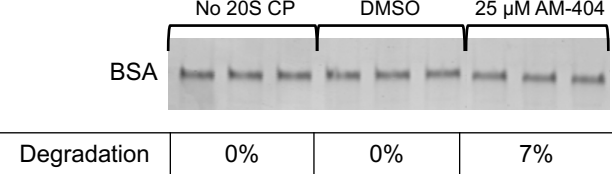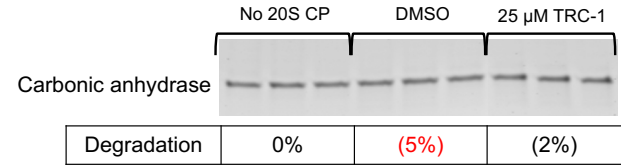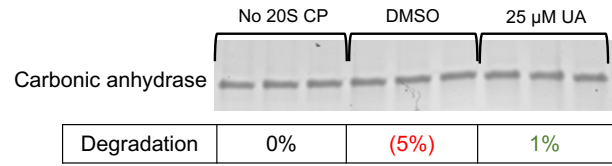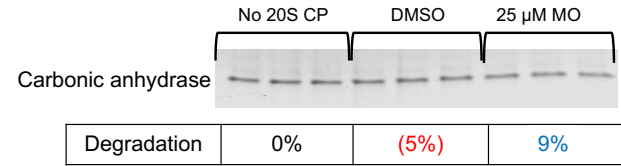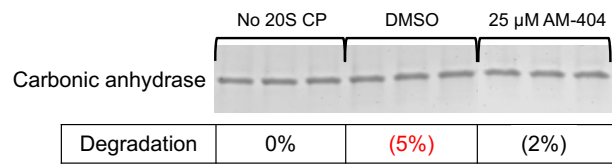

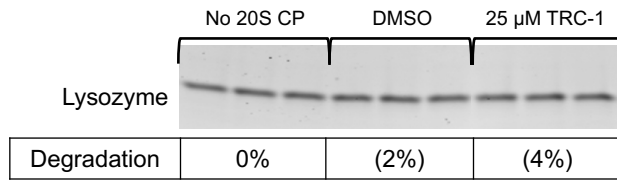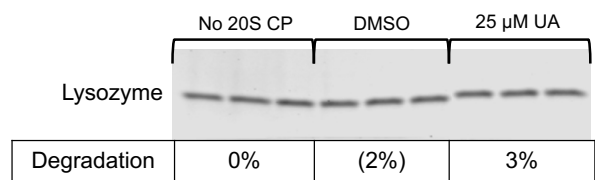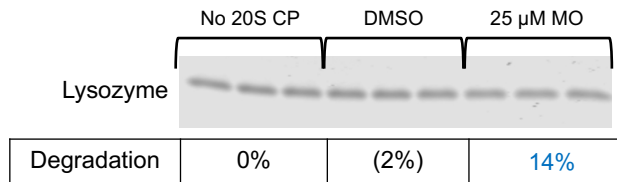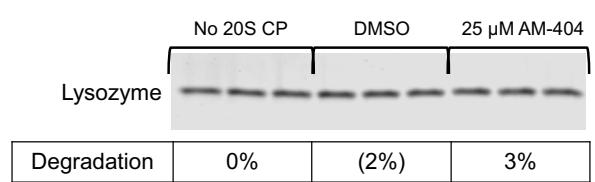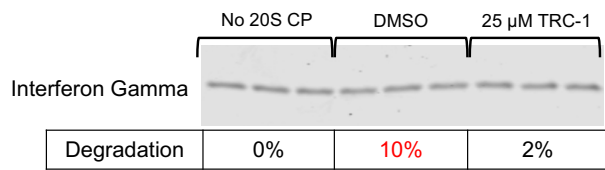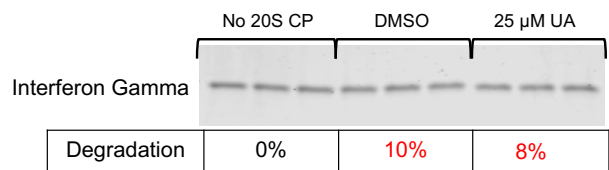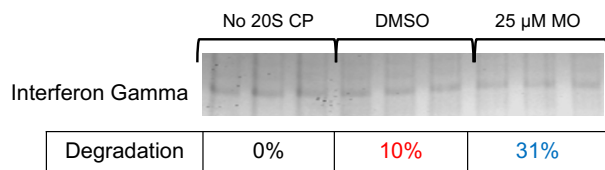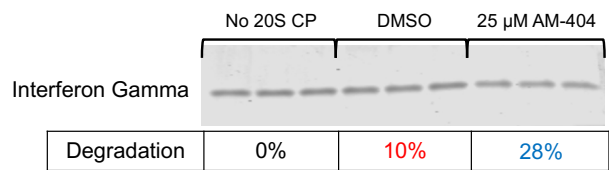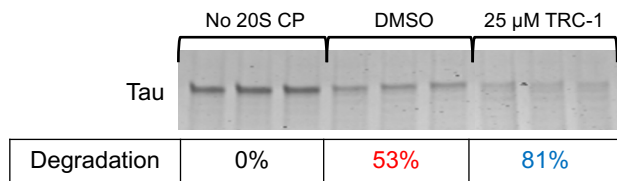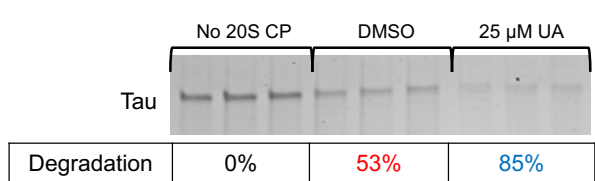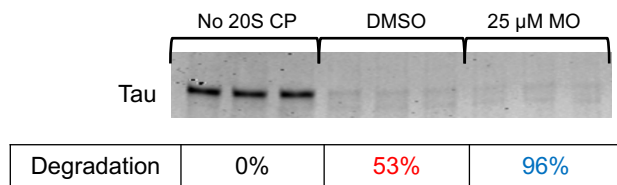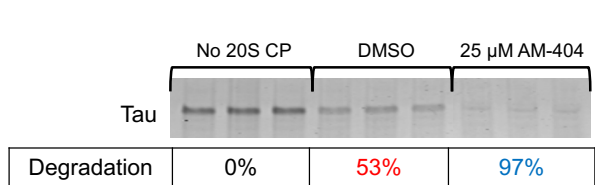

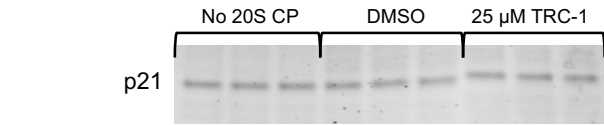

|             |    |     |    |
|-------------|----|-----|----|
| Degradation | 0% | 13% | 6% |
|-------------|----|-----|----|

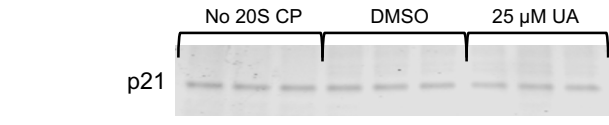

|             |    |     |     |
|-------------|----|-----|-----|
| Degradation | 0% | 13% | 24% |
|-------------|----|-----|-----|

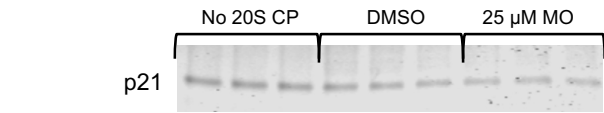

|             |    |     |     |
|-------------|----|-----|-----|
| Degradation | 0% | 13% | 43% |
|-------------|----|-----|-----|

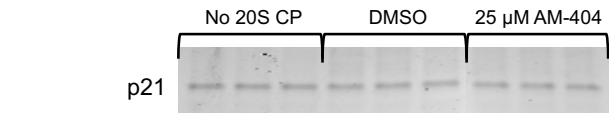

|             |    |     |     |
|-------------|----|-----|-----|
| Degradation | 0% | 13% | 23% |
|-------------|----|-----|-----|

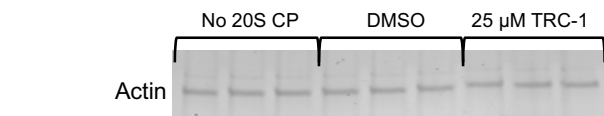

|             |    |    |     |
|-------------|----|----|-----|
| Degradation | 0% | 8% | 12% |
|-------------|----|----|-----|

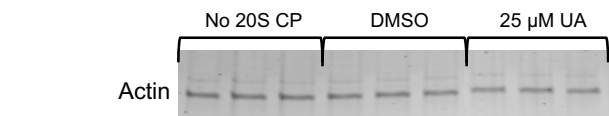

|             |    |    |     |
|-------------|----|----|-----|
| Degradation | 0% | 8% | 18% |
|-------------|----|----|-----|

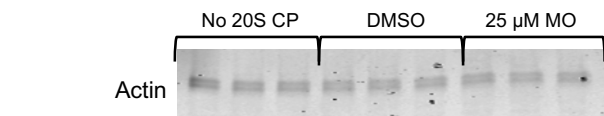

|             |    |    |     |
|-------------|----|----|-----|
| Degradation | 0% | 8% | 22% |
|-------------|----|----|-----|

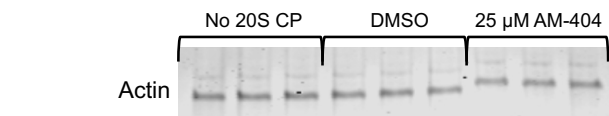

|             |    |    |     |
|-------------|----|----|-----|
| Degradation | 0% | 8% | 24% |
|-------------|----|----|-----|

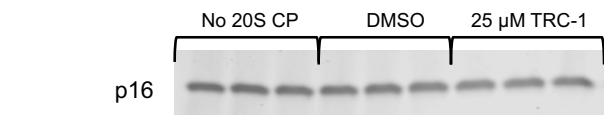

|             |    |    |     |
|-------------|----|----|-----|
| Degradation | 0% | 6% | 10% |
|-------------|----|----|-----|

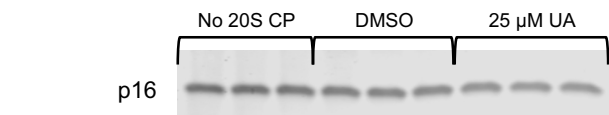

|             |    |    |     |
|-------------|----|----|-----|
| Degradation | 0% | 6% | 33% |
|-------------|----|----|-----|

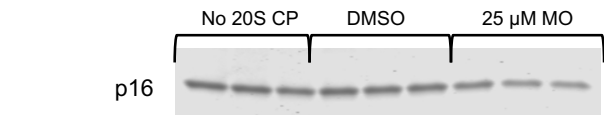

|             |    |    |     |
|-------------|----|----|-----|
| Degradation | 0% | 6% | 45% |
|-------------|----|----|-----|

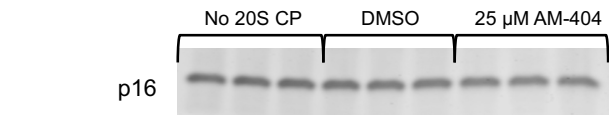

|             |    |    |    |
|-------------|----|----|----|
| Degradation | 0% | 6% | 9% |
|-------------|----|----|----|

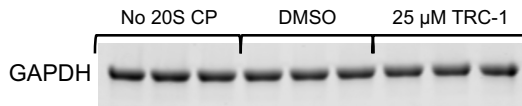

|             |    |      |    |
|-------------|----|------|----|
| Degradation | 0% | (1%) | 3% |
|-------------|----|------|----|

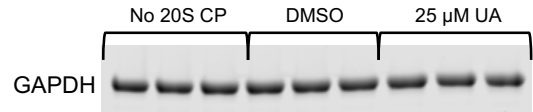

|             |    |      |      |
|-------------|----|------|------|
| Degradation | 0% | (1%) | (1%) |
|-------------|----|------|------|

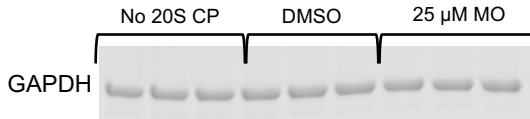

|             |    |      |      |
|-------------|----|------|------|
| Degradation | 0% | (1%) | (4%) |
|-------------|----|------|------|

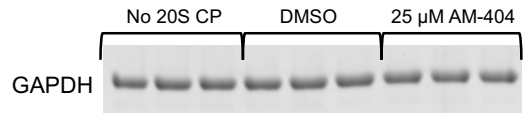

|             |    |      |    |
|-------------|----|------|----|
| Degradation | 0% | (1%) | 2% |
|-------------|----|------|----|

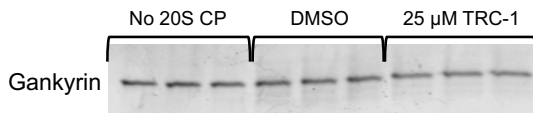

|             |    |     |     |
|-------------|----|-----|-----|
| Degradation | 0% | 10% | 20% |
|-------------|----|-----|-----|

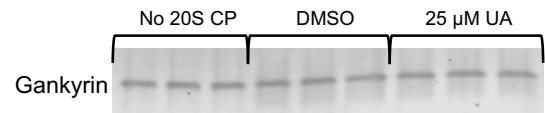

|             |    |     |    |
|-------------|----|-----|----|
| Degradation | 0% | 10% | 6% |
|-------------|----|-----|----|

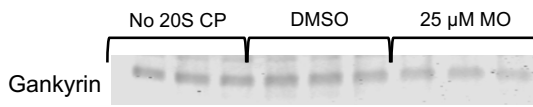

|             |    |     |     |
|-------------|----|-----|-----|
| Degradation | 0% | 10% | 29% |
|-------------|----|-----|-----|

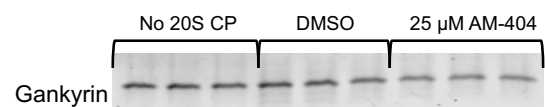

|             |    |     |     |
|-------------|----|-----|-----|
| Degradation | 0% | 10% | 31% |
|-------------|----|-----|-----|

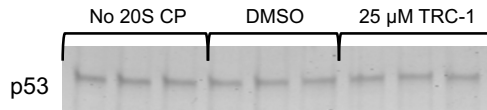

|             |    |     |     |
|-------------|----|-----|-----|
| Degradation | 0% | 23% | 15% |
|-------------|----|-----|-----|

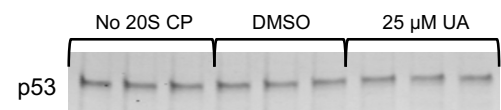

|             |    |     |     |
|-------------|----|-----|-----|
| Degradation | 0% | 23% | 26% |
|-------------|----|-----|-----|

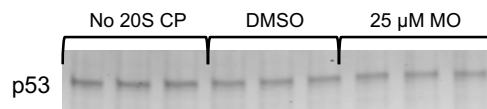

|             |    |     |     |
|-------------|----|-----|-----|
| Degradation | 0% | 23% | 30% |
|-------------|----|-----|-----|

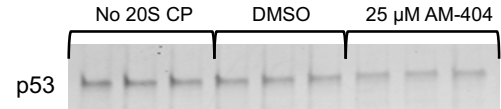

|             |    |     |     |
|-------------|----|-----|-----|
| Degradation | 0% | 23% | 51% |
|-------------|----|-----|-----|



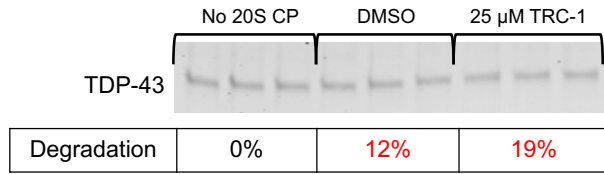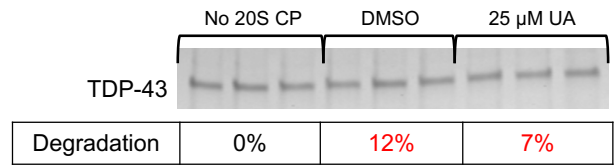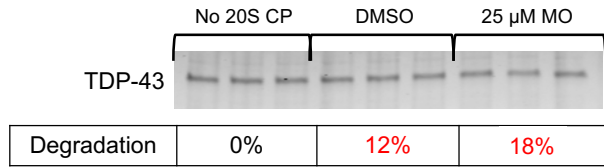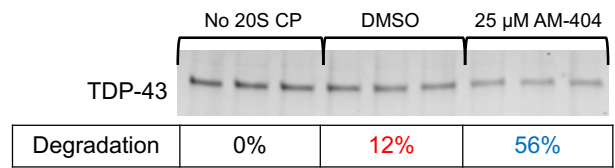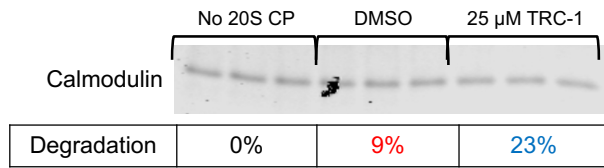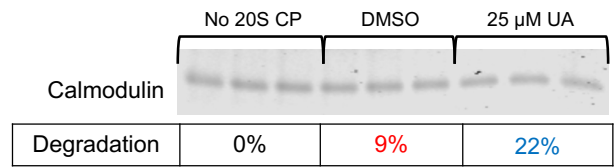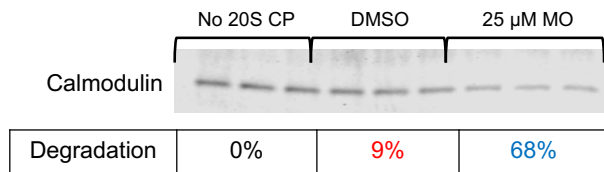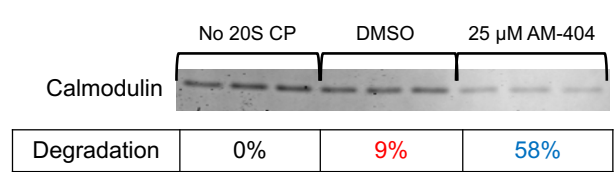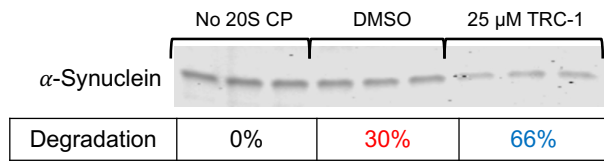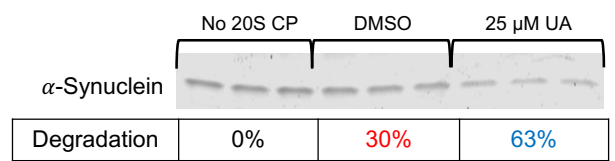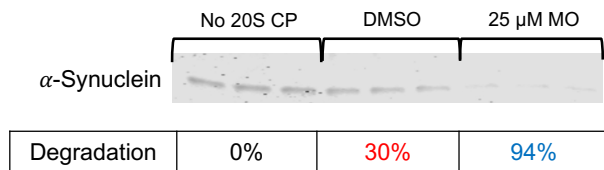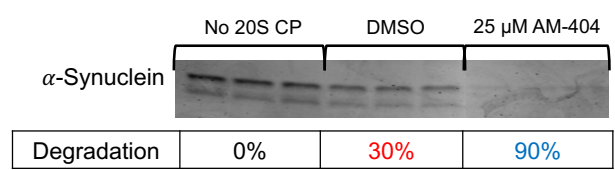

**Appendix II: Western blots of GFP-fusion proteins**

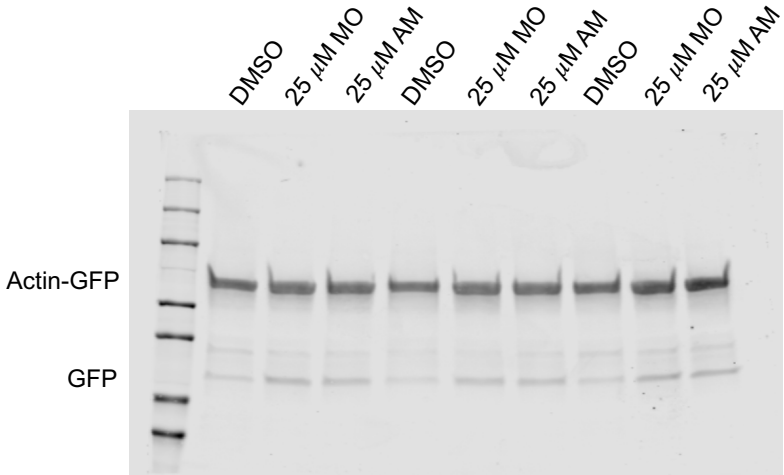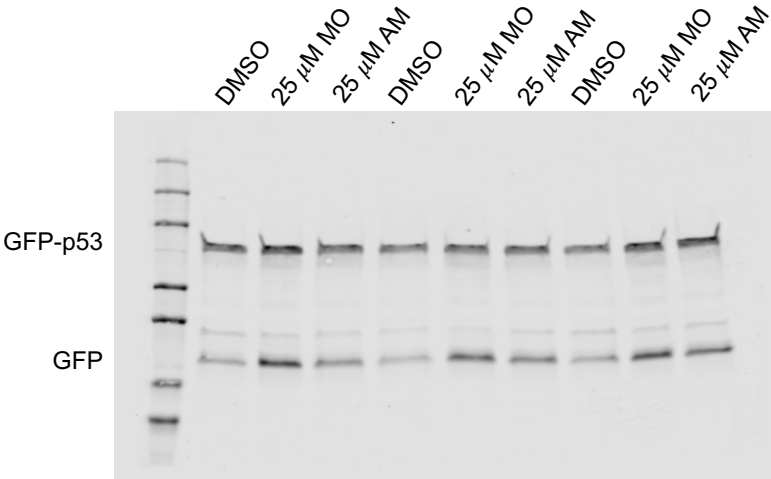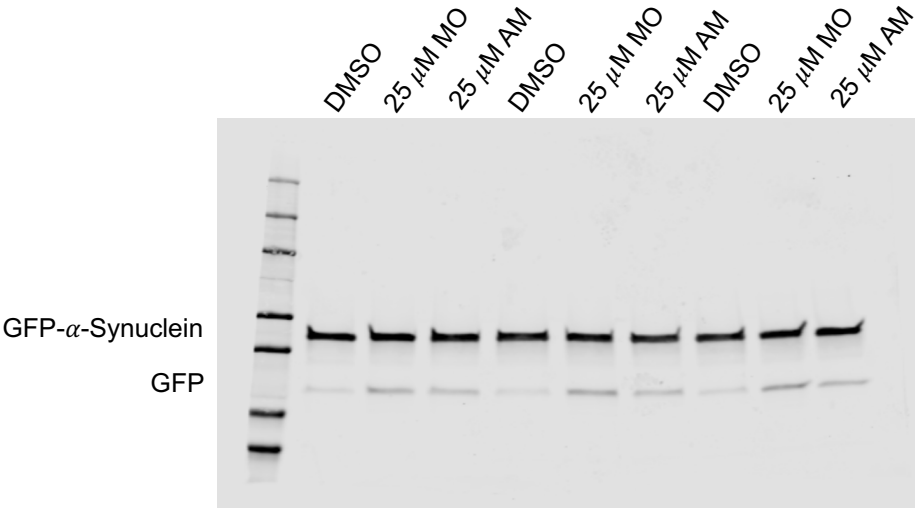

Supplement: CB-002-D0CB00191K-s002.pdf [file CB-002-D0CB00191K-s002.pdf]
