# Supplementary material for: Protein degradation profile reveals dynamic nature of 20S proteasome small molecule stimulation
Source: PubMed Central journal article supplement — RSC Chem Biol. 2021 Jan 5;2(2):636–44. doi: 10.1039/d0cb00191k (PMC8341874; doi:10.1039/d0cb00191k), 2021-01-05
Supplement: CB-002-D0CB00191K-s001.pdf [file CB-002-D0CB00191K-s001.pdf]

| Uniprot ID | AM | LOG(FC)    | p-value    | Btz-AM | LOG(FC)    | p-value    |
|------------|----|------------|------------|--------|------------|------------|
| A0A024RB14 |    | -3.8455906 | 0.02744183 |        | -1.2491527 | 0.37283946 |
| Q4VCS5     |    | -2.3614607 | 9.23E-06   |        | 0.29826355 | 0.06113121 |
| P82663     |    | -1.8680549 | 0.01645679 |        | -0.7229581 | 0.23267195 |
| A0A024R7C7 |    | -1.8337698 | 0.00606379 |        | -1.2026949 | 0.1675812  |
| Q9NRZ9     |    | -1.7672896 | 0.02909091 |        | 0.57560682 | 0.0500757  |
| O95235     |    | -1.7471876 | 0.00135384 |        | 1.4101429  | 0.02802734 |
| O75190     |    | -1.7426577 | 0.00476343 |        | -0.1029887 | 0.76579124 |
| A0A024R5K1 |    | -1.6594734 | 0.01123431 |        | -1.1028485 | 0.03142834 |
| O75179     |    | -1.6093965 | 0.01055973 |        | 1.11758375 | 0.03564184 |
| A0A3B3ITJ4 |    | -1.5339127 | 0.02775936 |        | -0.622324  | 0.31417012 |
| A0A024R328 |    | -1.4971542 | 0.00030933 |        | 0.21415663 | 0.12956684 |
| A0A024R704 |    | -1.4625783 | 0.00152061 |        | -0.7932243 | 0.21267921 |
| E9PS17     |    | -1.4315939 | 0.04367257 |        | 0.29323149 | 0.2774464  |
| A5D8W6     |    | -1.3870525 | 0.03599318 |        | 1.07907105 | 0.04701547 |
| Q8N995     |    | -1.3393607 | 0.04922266 |        | 1.1550808  | 0.03243137 |
| O95817     |    | -1.3343492 | 0.02708257 |        | 1.7122407  | 0.01548441 |
| B9EGI2     |    | -1.3265276 | 0.01962475 |        | -0.2416744 | 0.71634308 |
| O00767     |    | -1.3229942 | 0.0202665  |        | -0.5104194 | 0.5954368  |
| Q541A5     |    | -1.3138804 | 0.03499254 |        | 0.85045195 | 0.00087351 |
| Q14444     |    | -1.2785048 | 0.00965631 |        | -0.0108657 | 0.95785134 |
| Q9BTY7     |    | -1.2516351 | 0.00130834 |        | -0.626173  | 0.30001092 |
| F5H7W8     |    | -1.1902227 | 0.04770217 |        | 0.02433682 | 0.97317392 |
| B9EIS5     |    | -1.1525292 | 0.02051783 |        | -0.4680805 | 0.22447034 |
| Q5T911     |    | -1.1270795 | 0.01451395 |        | 0.10528851 | 0.63507646 |
| B3KMP2     |    | -1.0873861 | 0.0350586  |        | -0.0305691 | 0.84964292 |
| Q9WM08     |    | -1.0650659 | 0.00355048 |        | 0.6064086  | 0.2259355  |
| Q6IAX1     |    | -1.0494986 | 0.01624575 |        | 0.3759656  | 0.09617125 |
| A5PL36     |    | -1.0326076 | 0.0157403  |        | 1.12033272 | 0.0064119  |
| Q13085     |    | -0.9930902 | 0.03035118 |        | -0.0004177 | 0.99859488 |
| A0A087WUB9 |    | -0.9651518 | 0.02784484 |        | -0.4759398 | 0.39586339 |
| A0A1U9X9A9 |    | -0.9478951 | 0.02516781 |        | -0.0056105 | 0.97592406 |
| O75794     |    | -0.9472475 | 0.02336684 |        | 0.95936489 | 5.89E-05   |
| J3KPS0     |    | -0.9255652 | 0.00344902 |        | 0.19105625 | 0.63334754 |
| Q8N3C0     |    | -0.9231839 | 0.01245457 |        | 0.61011648 | 0.03098964 |
| Q9NYP9     |    | -0.9087944 | 0.04330215 |        | 0.46132898 | 0.02423665 |
| Q9H1A6     |    | -0.900332  | 0.00907853 |        | -0.291502  | 0.32663602 |
| H0Y7P7     |    | -0.8977251 | 0.00739233 |        | 0.00642777 | 0.97479749 |
| P15924     |    | -0.8662486 | 2.64E-05   |        | -0.0257659 | 0.67095777 |
| Q75ME3     |    | -0.8453097 | 0.02551032 |        | -0.0821466 | 0.81035354 |
| Q9NVH2     |    | -0.8317513 | 0.02379453 |        | 0.21611738 | 0.20215417 |
| Q5TZN3     |    | -0.778152  | 0.04073785 |        | 0.96437359 | 0.00170689 |
| A0A024R0E2 |    | -0.7434745 | 0.00726494 |        | 0.25261068 | 0.10903227 |
| Q9H2J4     |    | -0.7370086 | 0.04931412 |        | 0.3873539  | 0.6982797  |
| A0A140VJE3 |    | -0.7323732 | 0.0155651  |        | 0.60453367 | 0.02354821 |

|            |            |            |            |            |
|------------|------------|------------|------------|------------|
| G5EA36     | -0.703804  | 0.01000708 | -0.2122741 | 0.07003901 |
| A8K622     | -0.6831727 | 0.00593325 | 0.38007736 | 0.03477262 |
| Q9UJX2     | -0.6742396 | 0.00918005 | 0.42037439 | 0.15248876 |
| A0A024R9G7 | -0.673851  | 0.04581712 | -0.1003413 | 0.66349074 |
| Q68E01     | -0.664886  | 0.02523296 | -0.2264624 | 0.29108628 |
| A8K2U2     | -0.661799  | 0.00274946 | -0.1565776 | 0.28956397 |
| A8K6V7     | -0.6298695 | 0.0109902  | 0.11518288 | 0.39135289 |
| Q4TT34     | -0.629025  | 0.04639295 | -0.116159  | 0.53834116 |
| Q9NWX2     | -0.6229687 | 0.04208678 | -0.2131667 | 0.70821838 |
| Q7Z417     | -0.6034613 | 0.00543568 | -0.0873985 | 0.78839595 |
| Q14694     | -0.5908613 | 0.04085339 | -0.0917797 | 0.62763069 |
| P23258     | -0.5799751 | 0.00126254 | 0.5526638  | 0.00184932 |
| B4DYY5     | -0.566638  | 0.01780671 | 0.01052904 | 0.94390079 |
| O95782     | -0.5608821 | 0.00096917 | -0.217855  | 0.2291769  |
| P11171     | -0.5515823 | 0.00069923 | -0.144968  | 0.14316834 |
| H3BLV9     | -0.5449986 | 0.00048015 | -0.1143098 | 0.48231124 |
| A8K7D9     | -0.5377903 | 8.06E-05   | 0.39705277 | 0.00231884 |
| P31689     | -0.5305128 | 0.00729896 | 0.53477764 | 0.00801064 |
| P49327     | -0.5105238 | 0.03876935 | 0.125103   | 0.46048062 |
| Q9Y3D0     | -0.5041137 | 0.0402622  | -0.1993709 | 0.33209558 |
| Q53F35     | 0.50138235 | 0.00302227 | 0.25044298 | 0.12190188 |
| P52788     | 0.51951027 | 0.02450223 | -0.2780256 | 0.54591533 |
| A0A024R8Q1 | 0.52520943 | 0.00284375 | -1.3256388 | 0.02990129 |
| MOQXF7     | 0.53252411 | 0.02650899 | -0.390554  | 0.42078291 |
| A0A024RAJ6 | 0.53439474 | 0.0064981  | -0.327301  | 0.14943613 |
| A0A024R325 | 0.5478158  | 0.00325017 | 0.07361364 | 0.63048035 |
| Q9BVJ8     | 0.5507803  | 0.01371849 | -0.2551742 | 0.10278655 |
| A0A384NPM7 | 0.55737591 | 0.02057936 | -0.7681303 | 0.04186057 |
| Q9UFN0     | 0.57180929 | 0.01138161 | -0.0342722 | 0.80085581 |
| V9HWE0     | 0.57875061 | 0.01040763 | 0.18410778 | 0.46065799 |
| B2R728     | 0.5835104  | 0.01979247 | 0.15411282 | 0.45220395 |
| A0A087WUQ6 | 0.58851481 | 0.00085954 | 0.28405857 | 0.22344384 |
| H0Y8X4     | 0.58882141 | 0.01023653 | 0.16850996 | 0.4464635  |
| B1AK13     | 0.59172201 | 0.01506023 | -0.2647753 | 0.46914728 |
| Q92522     | 0.59891367 | 0.01319577 | -0.1292243 | 0.5780008  |
| H0YAE9     | 0.60220385 | 0.00153699 | -0.3798943 | 0.05070937 |
| A0A024R648 | 0.60743952 | 0.03982488 | -0.3046279 | 0.21682223 |
| R4SBI6     | 0.61616707 | 0.02017873 | -0.1221218 | 0.60506423 |
| A0A0S2Z5Q3 | 0.66539574 | 0.04607046 | -1.0469446 | 0.02858539 |
| P07305     | 0.66956568 | 0.03063936 | -1.0236306 | 0.00284367 |
| V9HWJ1     | 0.69042587 | 0.03117673 | -0.1664972 | 0.46619119 |
| Q9H488     | 0.72599173 | 0.01860569 | -0.1041942 | 0.79955808 |
| P08243     | 0.73029423 | 0.00183394 | 0.32344675 | 0.06143342 |
| A0A090N7V5 | 0.75019264 | 0.01225163 | 0.14398813 | 0.77658384 |
| B4DSE2     | 0.76098299 | 0.02538146 | -0.8195572 | 0.22035721 |

|            |            |            |            |            |
|------------|------------|------------|------------|------------|
| B4DP06     | 0.76779938 | 0.00224331 | 0.18549156 | 0.56102757 |
| F5GZS6     | 0.800488   | 0.00053509 | 0.07270336 | 0.50546792 |
| Q8TE01     | 0.82273197 | 0.0088898  | 0.38421249 | 0.05525006 |
| Q9NZ23     | 0.94562531 | 0.0010972  | 0.45193434 | 0.01315376 |
| A0A024R222 | 1.0213418  | 0.00219105 | 0.50350618 | 0.01464075 |
| L0R6Q1     | 1.16142893 | 0.04367639 | -0.0423279 | 0.92522032 |
| B4E2V5     | 1.28496933 | 0.04513276 | -1.112143  | 0.17191579 |
| Q59ET7     | 1.28677368 | 0.04045759 | 0.25643015 | 0.76495636 |
| A0A384MTT2 | 1.56041765 | 2.59E-05   | -0.8098416 | 0.00612932 |
| P63096     | 1.89131928 | 0.02564712 | 1.10742617 | 0.08658522 |
| B4DTU7     | 2.05089331 | 0.00042412 | -0.5907989 | 0.36075853 |
| A0A024ROW3 | 2.13770199 | 0.00974572 | 0.74093676 | 0.52396555 |
| P32929     | 2.20345879 | 0.00570535 | 0.22905874 | 0.70027385 |
